# Supplementary material for: Graphene oxide/alginate/polyacrylate hydrogels as a draw agent for osmosis water purification
Source: Royal Society of Chemistry journal article supplement (doi:10.1039/d3ew00502j), 2023-01-01
Supplement: d3ew00502j1.pdf [file d3ew00502j1.pdf]

Electronic Supplementary Information

## Graphene oxide/alginate/polyacrylate hydrogels as a draw agent for forward osmosis

Adetunji Alabi<sup>1</sup>, Linda Zou<sup>1\*</sup>

<sup>1</sup>Department of Civil Infrastructure and Environmental Engineering, Khalifa University of Science and Technology, PO Box 127788, Abu Dhabi, United Arab Emirates

\*Corresponding author

Email: linda.zou@ku.ac.ae

### UV/Vis calibration curve

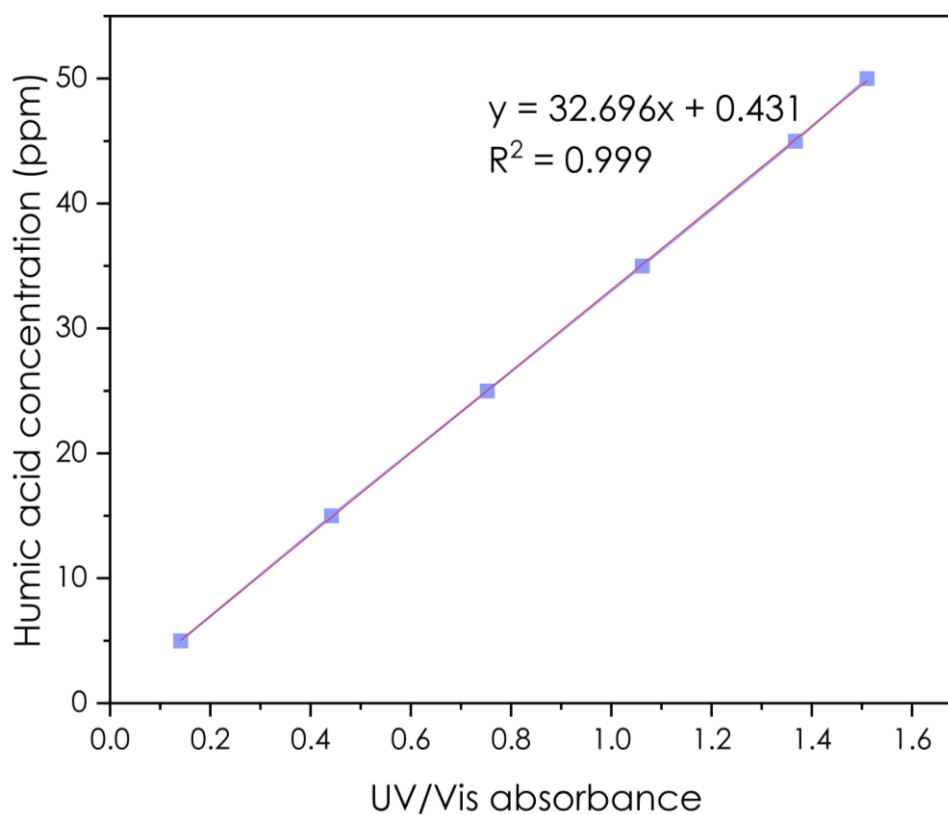

**Figure S1** UV/Vis calibration curve for humic acid.

## Humic acid rejection

**Table S1** Humic acid rejection and concentration values based on calibration curve

| Sample            | Absorbance | Concentration (ppm) | % Rejection |
|-------------------|------------|---------------------|-------------|
| A-PAA Permeate    | 0.1009     | 2.87                | 94%         |
| A-PAA-GO Permeate | 0.1189     | 3.46                | 93%         |
